# Supplementary material
Source: Springer Nature journal article supplement (https://www.springermedizin.de/resource/supplementary/13023_2008_125_MOESM4_ESM.pdf/9641686)
Supplement: MOESM4 [file 9641686]

## MIXED CRYOGLOBULINEMIA SYNDROME

### SERUM MIXED CRYOGLOBULINS ALONE

Monitoring without treatment  
Possible preclinical condition with RF+ and/or low complement  
Careful clinical evaluation of possible underlying infectious, autoimmune and/or lymphoproliferative/neoplastic disorders

2

### MIXED CRYOGLOBULINS + CLINICAL MC SYMPTOMS

Classical MC syndrome (cryoglobulinemic vasculitis) essential or secondary to other infectious, autoimmune and/or lymphoproliferative/neoplastic disorders

1

### CLINICAL MC SYMPTOMS WITHOUT SERUM MIXED CRYOGLOBULINS

Absence of cryoprecipitable CIC  
Repeat cryoglobulin detection at different time intervals to confirm the diagnosis of MC syndrome.  
Exclude other infectious, autoimmune and/or lymphoproliferative/neoplastic disorders

3
